# Supplementary figures and images for: A Multifunctional Biodegradable Prussian blue Analogue for Synergetic Photothermal/Photodynamic/Chemodynamic therapy and Intrinsic Tumor Metastasis Inhibition
Source: Research Square preprint supplement (doi:10.21203/rs.3.rs-240564/v1), 2021-02-23

**Graphical Abstract**

**
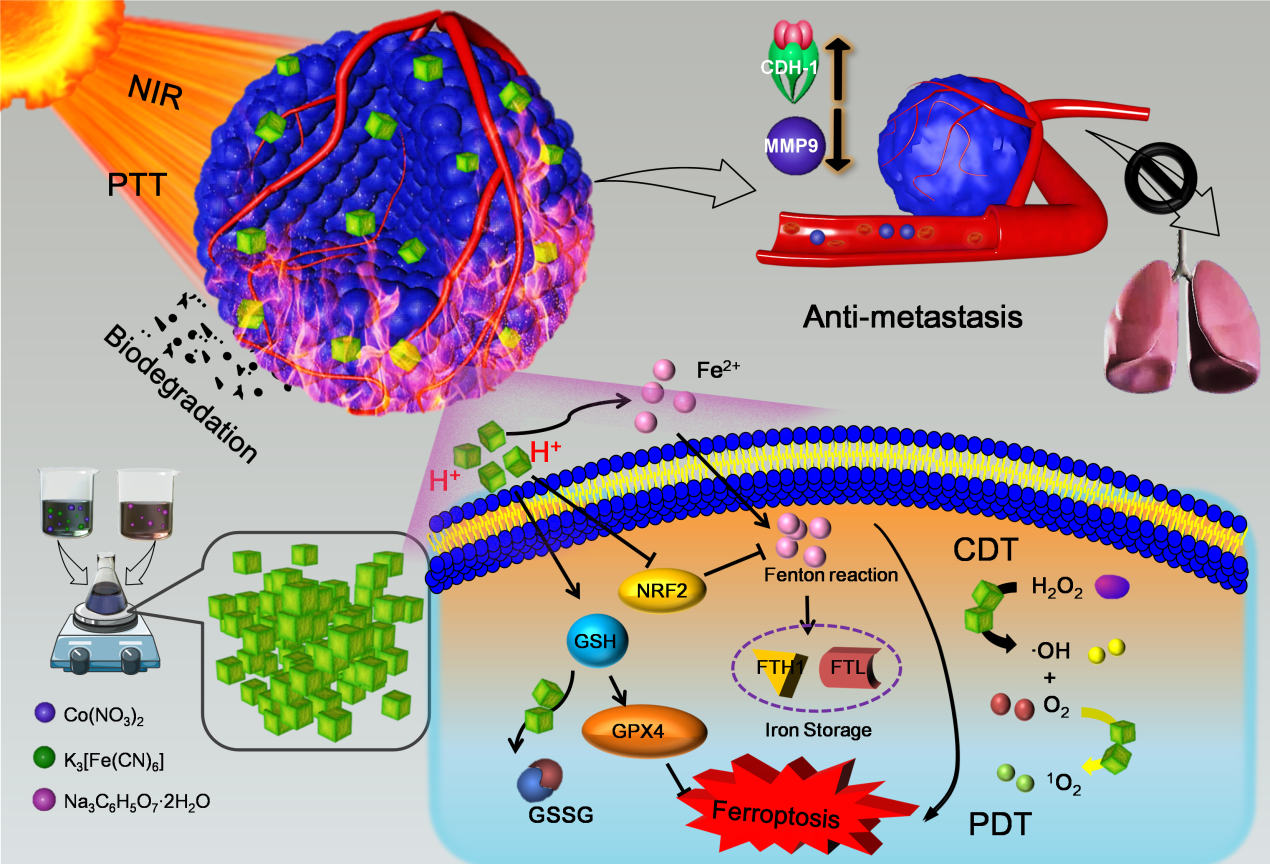
**

Supplement: Supplementary file 1 [file 3b2680ac2900ad019c001be0.docx]
